# Supplementary material for: Molecular braids in metal–organic frameworks
Source: Royal Society of Chemistry journal article supplement (doi:10.1039/c2cs35202h), 2012-01-01
Supplement: c2cs35202h.pdf [file c2cs35202h.pdf]

**Supplementary Material (ESI) for Chemical Society Reviews**

**This journal is (c) The Royal Society of Chemistry 2012**

**Molecular braids in metal-organic frameworks**

**Guo-Ping Yang, Lei Hou, Xin-Jun Luan, Biao Wu and Yao-Yu Wang\***

*Key Laboratory of Synthetic and Natural Functional Molecule Chemistry of the Ministry of Education, Shaanxi Key Laboratory of Physico-Inorganic Chemistry, College of Chemistry & Materials Science, Northwest University, Xi'an, 710069, Shaanxi, P. R. China.*

*E-mail: [wyaoyu@nwu.edu.cn](mailto:wyaoyu@nwu.edu.cn); Fax: +86-29-88303798; Tel: +86-29-88308031.*

**Electronic Supplementary Information**

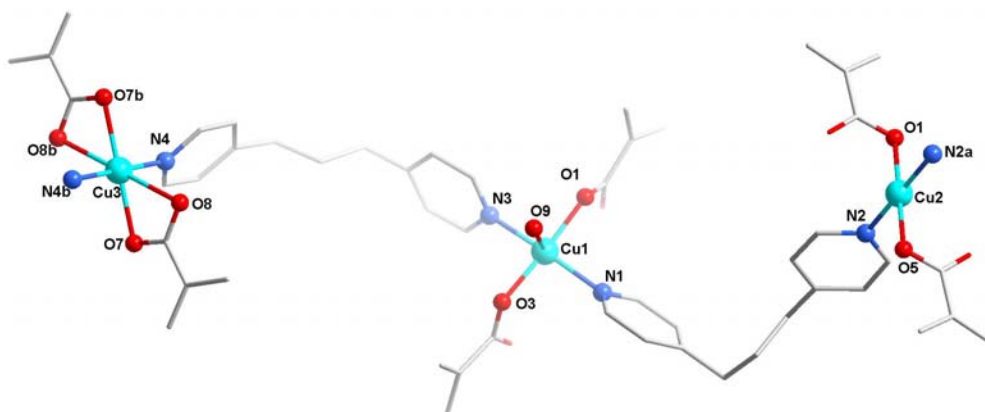

Fig. S1 The three types of different coordination environments of the Cu(II) ions in **1**. Symmetry codes: a.  $-x, 2-y, 3-z$ ; b.  $-x, 2-y, -z$ .

5

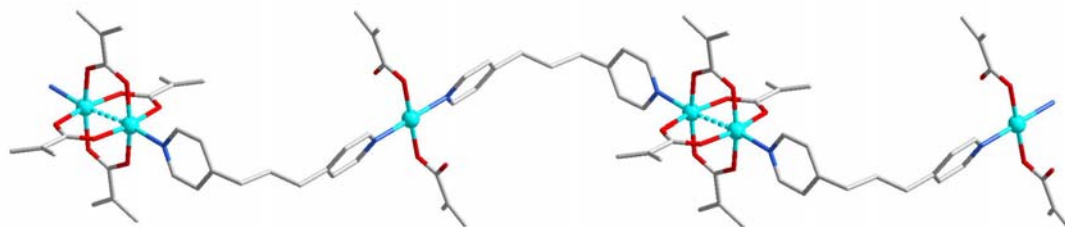

Fig. S2 The 1D zigzag-like chain with the mono- and dinuclear nodes in **2**.

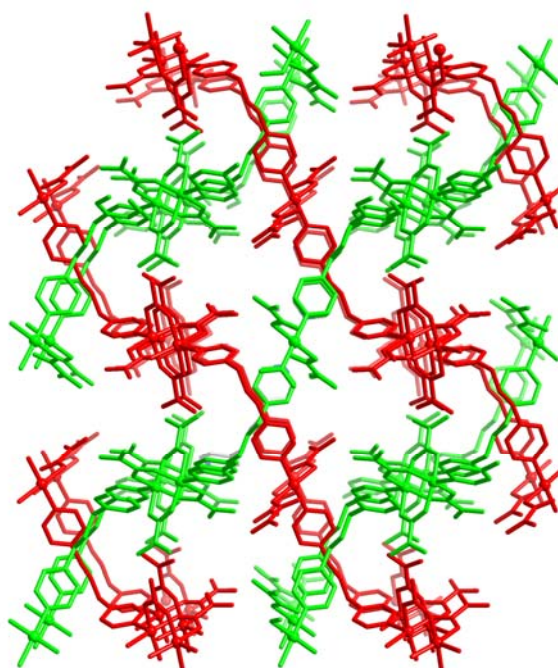

10 Fig. S3 The perspective view of packing motif of the 1D zigzag-like chains along the  $c$  axis of **2**.

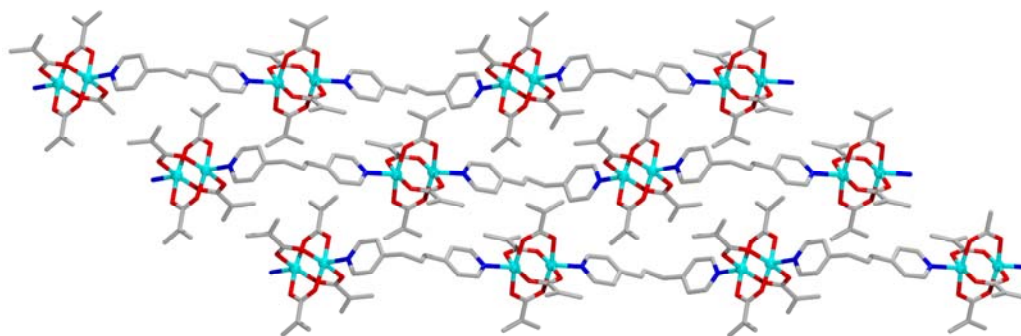

Fig. S4 The parallel arrangement of the 1D zigzag chains based on the dinuclear nodes of **3**.

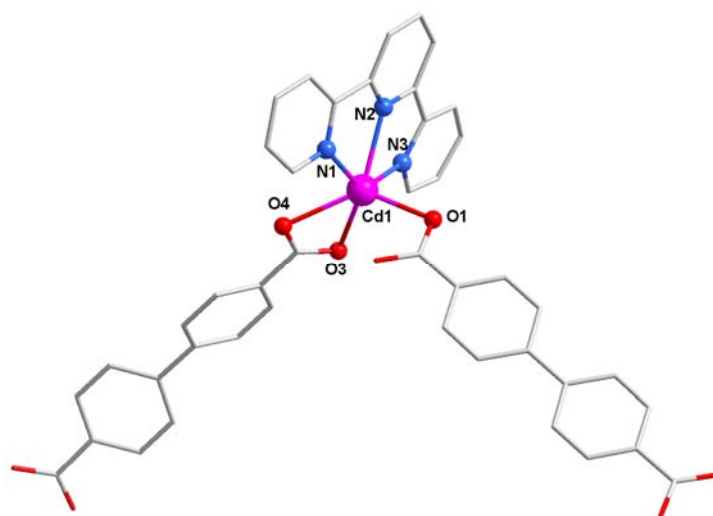

15

Fig. S5 The coordination environment of the Cd(II) ion in **4**. Copyright 2006 Wiley-VCH.

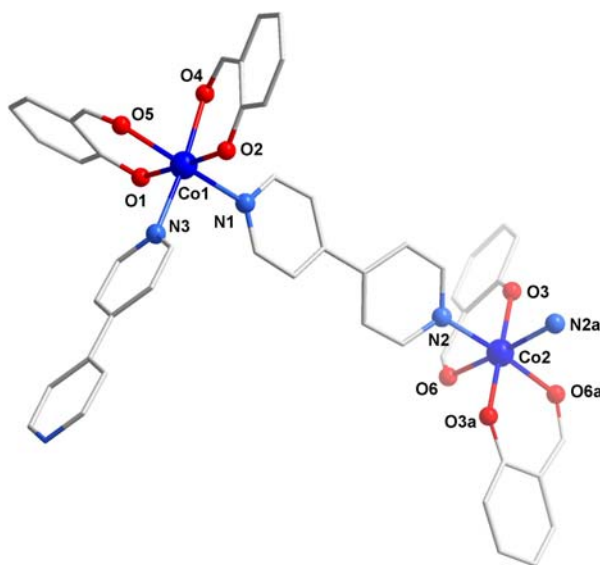

Fig. S6 The coordination environments of the Co(II) ions in **5**. Symmetry code: a.  $-x, y, 1.5-z$ .

20

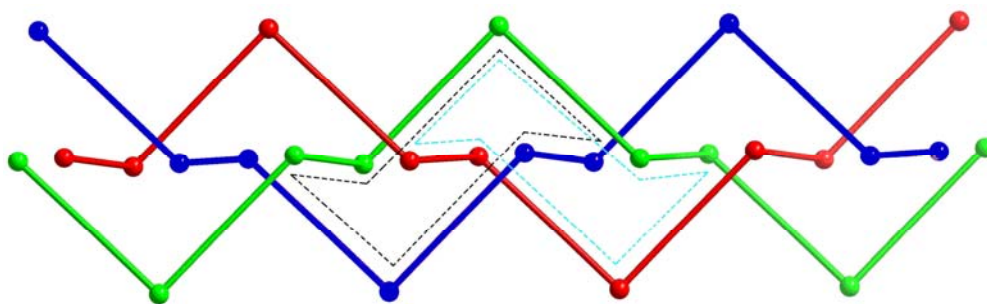

Fig. S7 The topological view of the triple-stranded molecular braid of **5**.

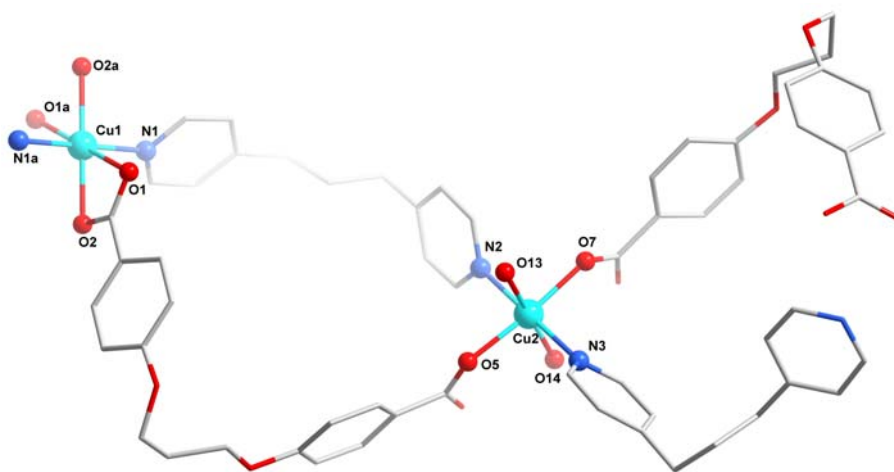

25

Fig. S8 The coordination environments of the Cu(II) ions in **6**. Symmetry code: a. 3-x, 1-y, 1-z.

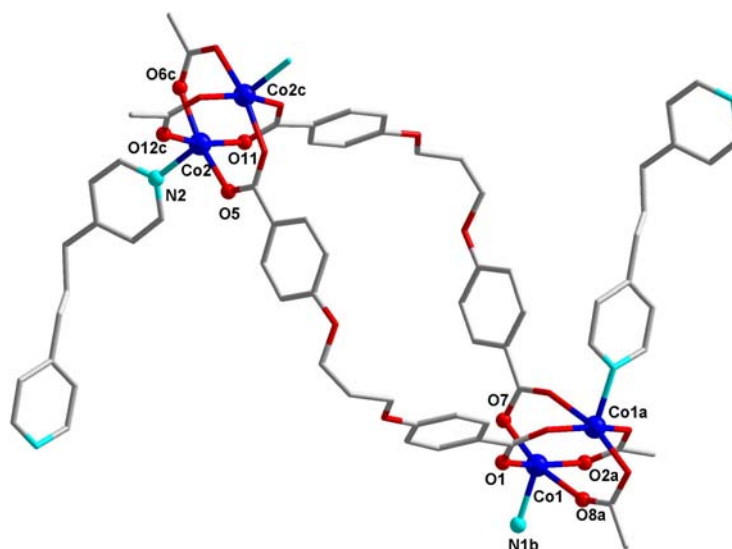

30

Fig. S9 The coordination environments of the Co(II) ions in **8**. Symmetry codes: a. 1-x, -y, 1-z; b. 1-x, 1-y, 1-z; c. 2-x, 1-y, -z.

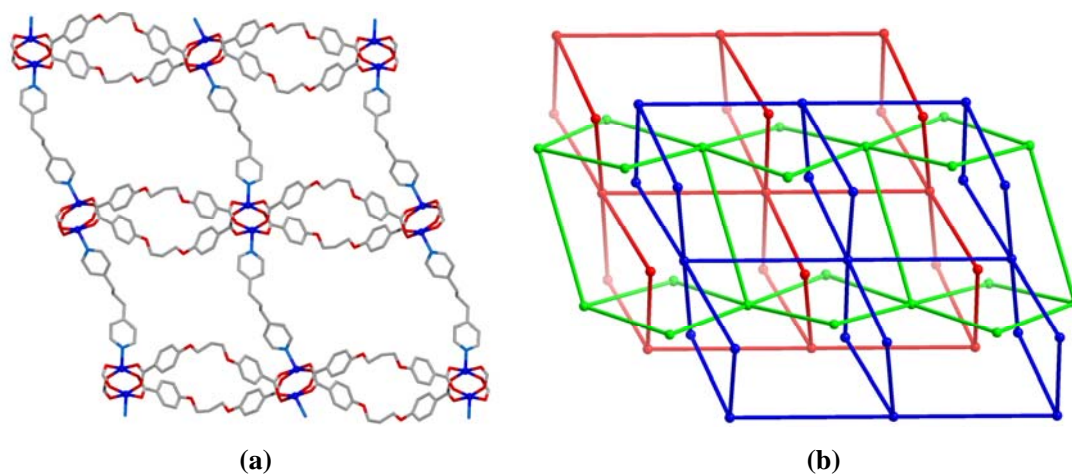

35 Fig. S10 (a) A single 2D undulated sheet based on the paddle-wheel  $\text{Co}_2(\text{CO}_2)_4$  dimeric units in **8**;  
(b) the schematic view of the three-fold interpenetrated motif involving 2-membered circuits in **8**.

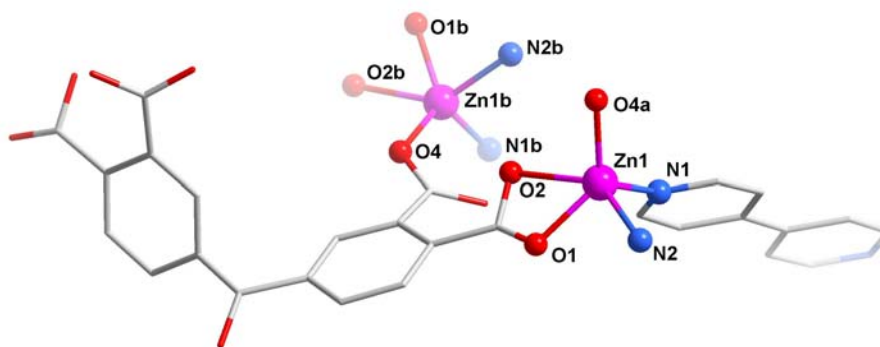

40 Fig. S11 The coordination environments of the Zn(II) ions in **9**. Symmetry codes: a.  $x, 1-y, 0.5+z$ ;  
b.  $x, 1-y, -0.5+z$ .

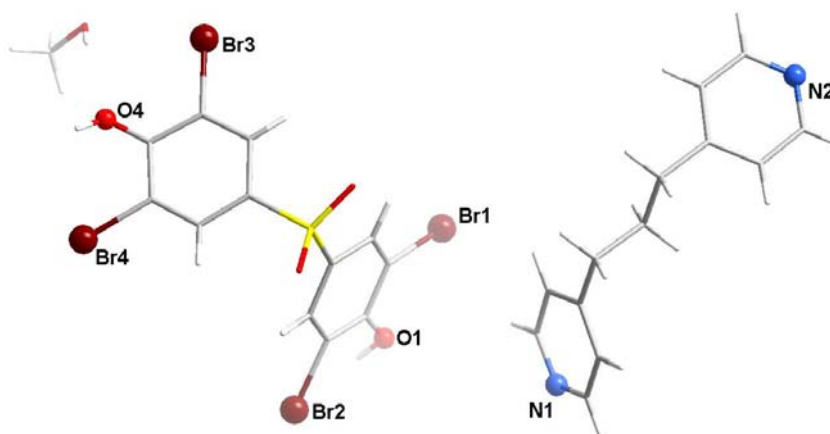

Fig. S12 The view of the basic building unit of co-crystal **10**.
